# Supplementary material
Source: Springer Nature journal article supplement (https://www.springermedizin.de/resource/supplementary/12936_2011_1807_MOESM1_ESM.pdf/9541732)
Supplement: MOESM1 [file 9541732]

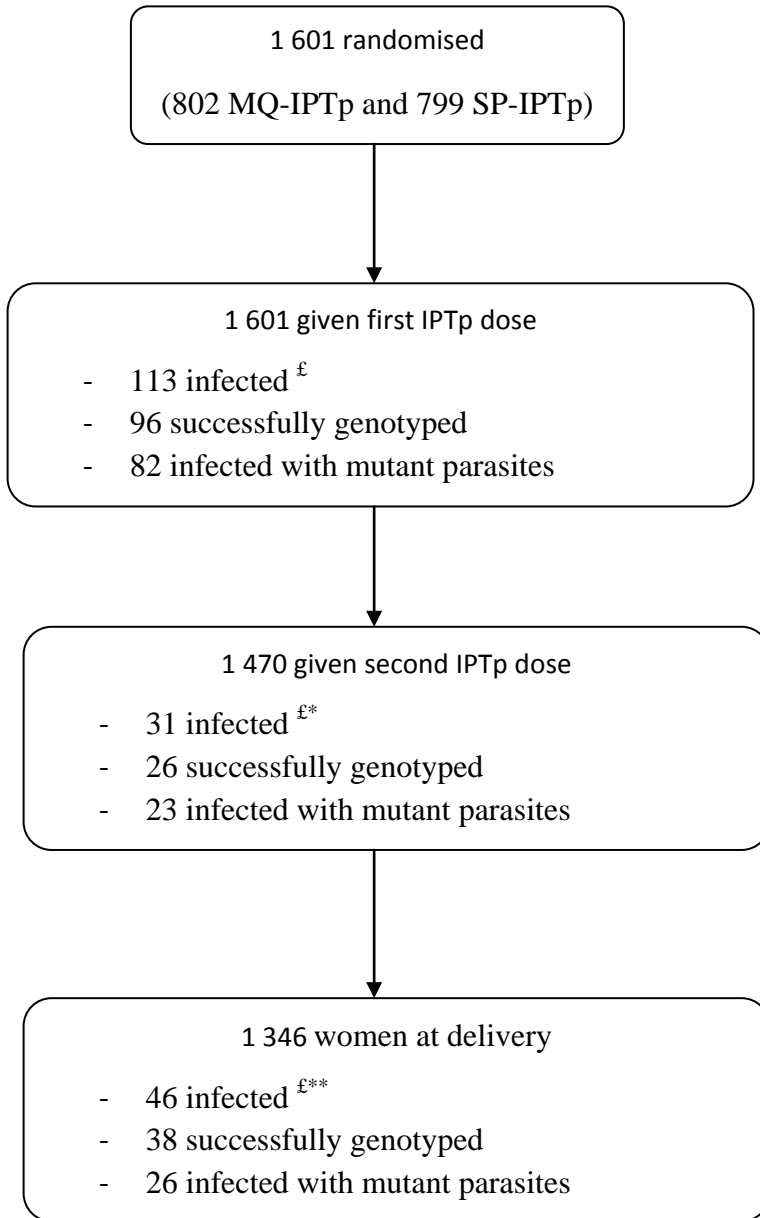

<sup>£</sup> women with positive thick blood smear and/or positive *Plasmodium falciparum* PCR

\* 2 women infected at the first and second IPTp administrations

\*\* 3 women infected at the first IPTp administration and at delivery; 4 women infected at the second IPTp administration and at delivery
